# Supplementary material for: Synthesis, electrochemical, fluorescence and antimicrobial studies of 2-chloro-3-amino-1,4-naphthoquinone bearing mononuclear transition metal dithiocarbamate complexes [M{κ2S,S-S2C–piperazine–C2H4N(H)ClNQ}n]
Source: Royal Society of Chemistry journal article supplement (doi:10.1039/c5ra08065g), 2015-01-01
Supplement: c5ra08065g1.pdf [file c5ra08065g1.pdf]

## Supplementary Information

Synthesis, electrochemical, fluorescence and antimicrobial studies of 2-chloro-3-amino-1,4-naphthoquinone bearing mononuclear transition metal dithiocarbamate complexes

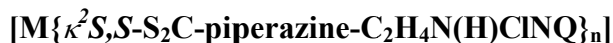

Sanjay K Verma and Vinay K Singh\*

Department of Chemistry, Faculty of Science, The M. S. University of Baroda,  
Vadodara-390 002, India.

Email: [vks.msu@gmail.com](mailto:vks.msu@gmail.com); [vinay.singh-chem@msubaroda.ac.in](mailto:vinay.singh-chem@msubaroda.ac.in)

1. **IR spectra:** IR spectra of the 2-chloro-3-{2-(piperazinyl)ethyl}-amino-1, 4-naphthoquinone (**L**) and its complexes are summarized below as Fig. S1 to S5.

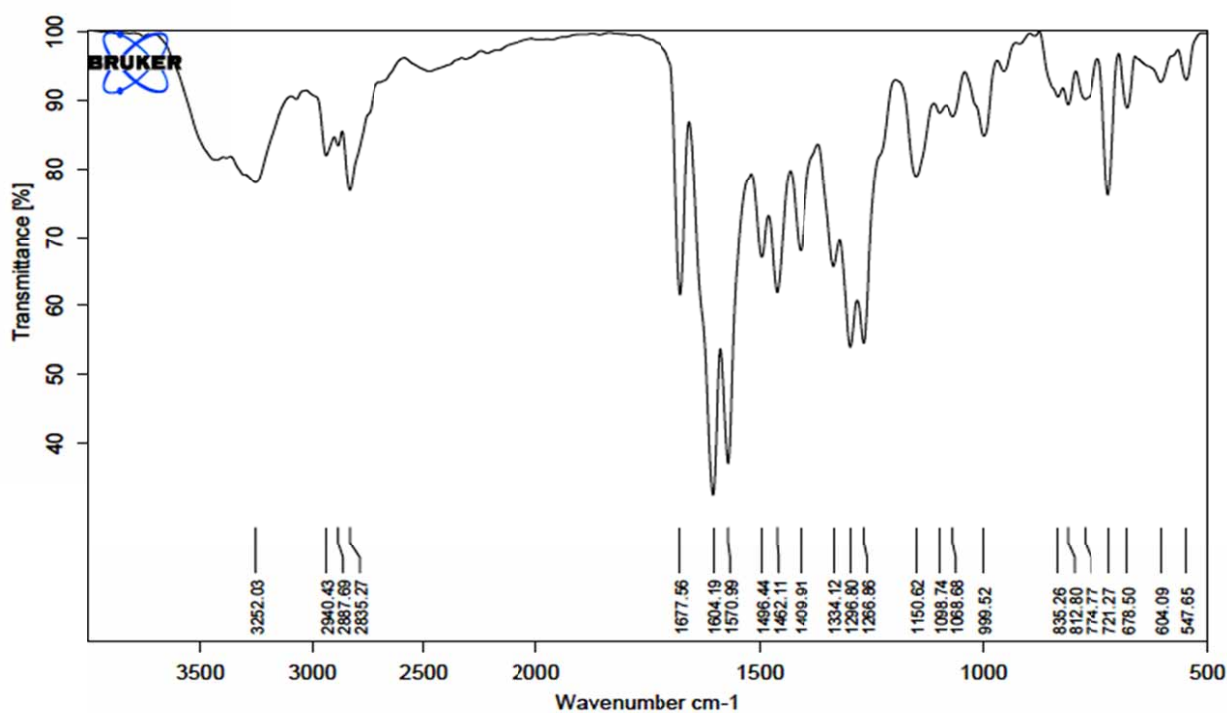

Fig. S1: IR Spectrum of the 2-chloro-3-{2-(piperazinyl)ethyl}-amino-1, 4-naphthoquinone (**L**)

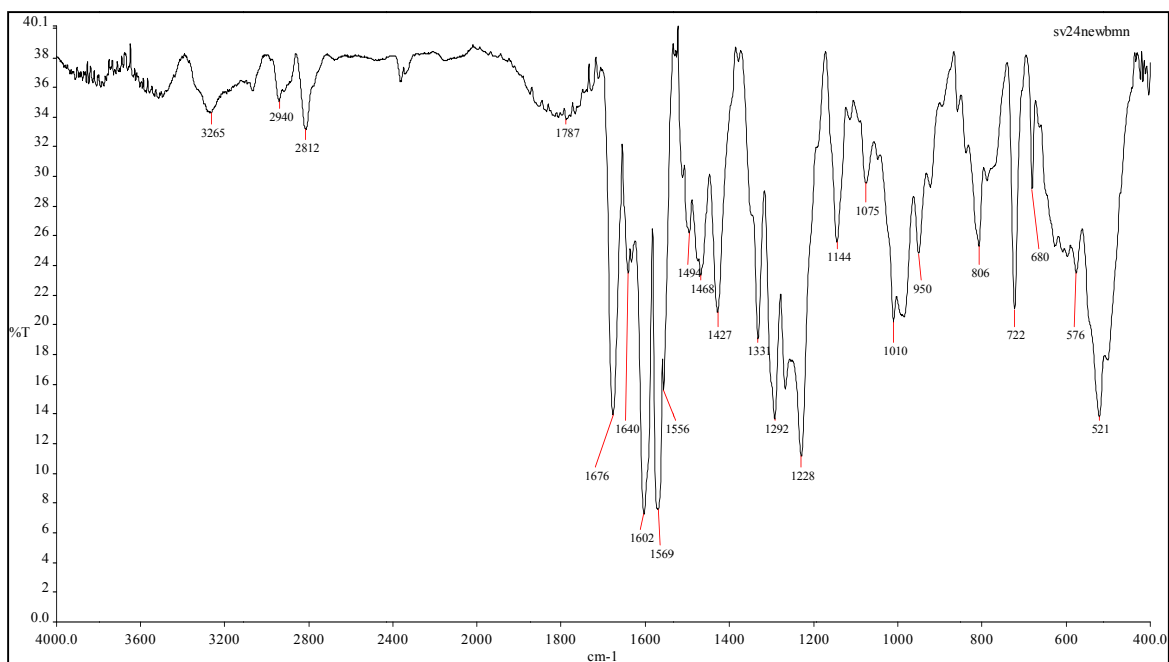

Fig. S2: IR Spectrum of compound 1

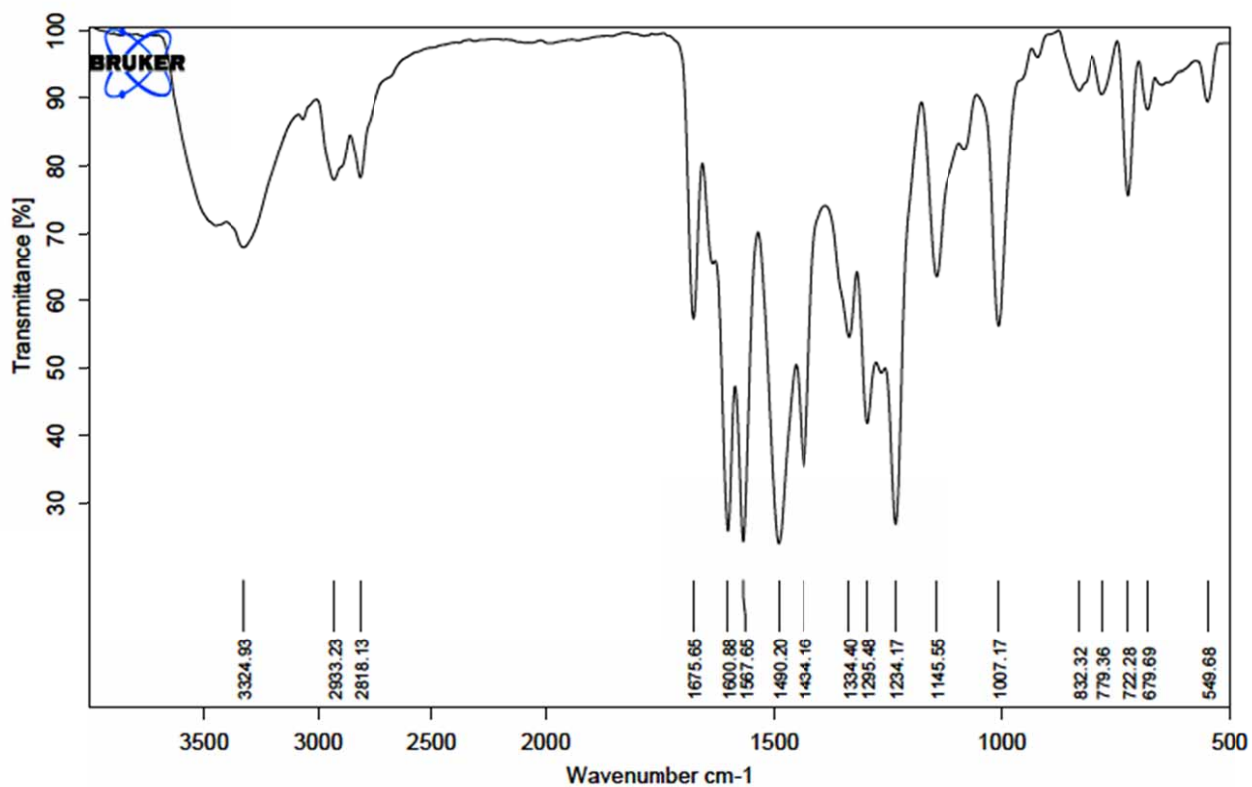

Fig. S3: IR Spectrum of compound 2

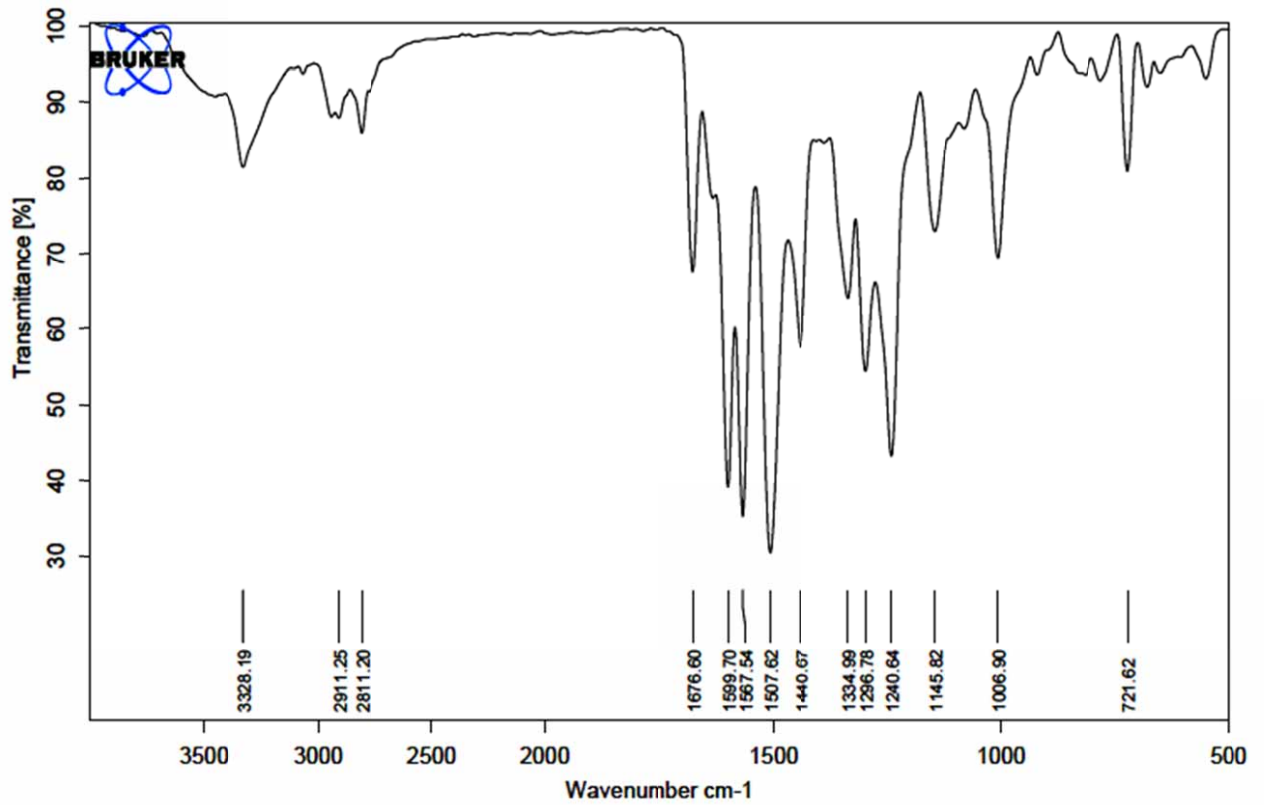

Fig. S4: IR Spectrum of compound 3

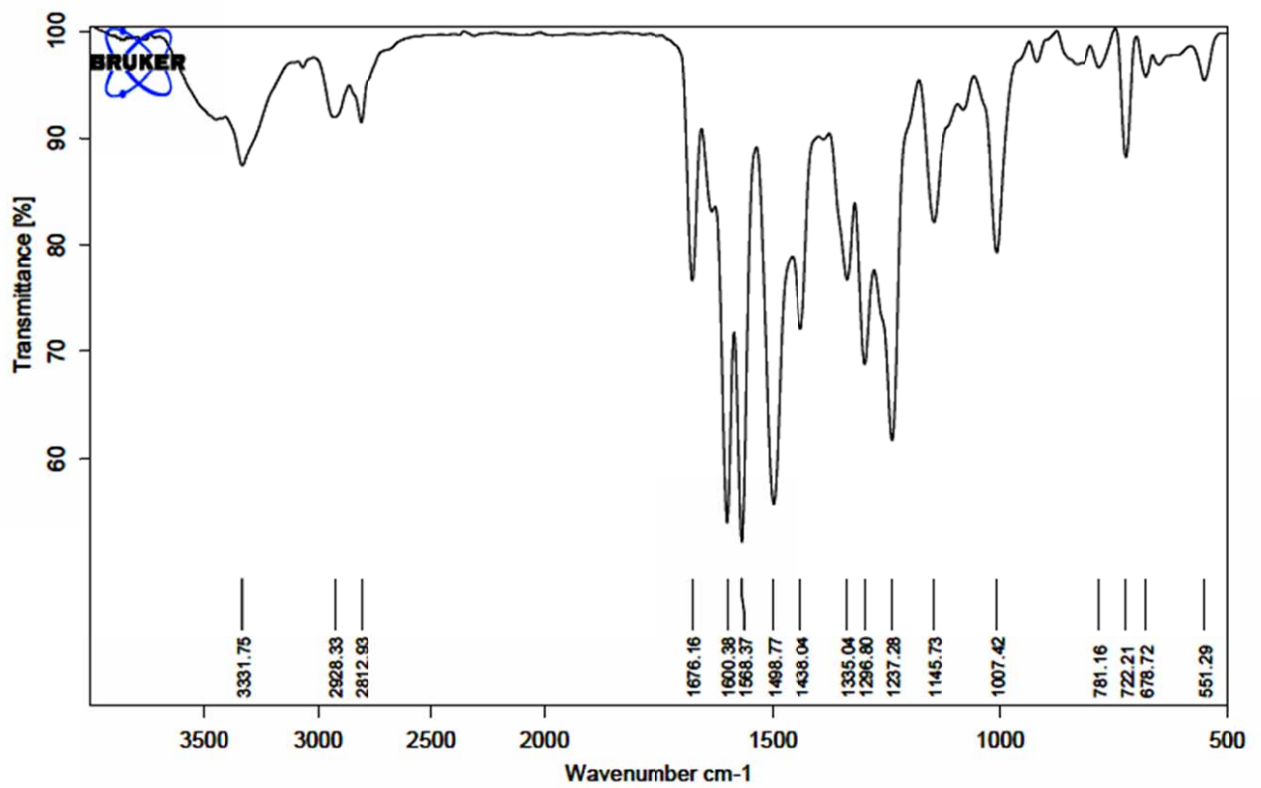

Fig. S5: IR Spectrum of compound 4

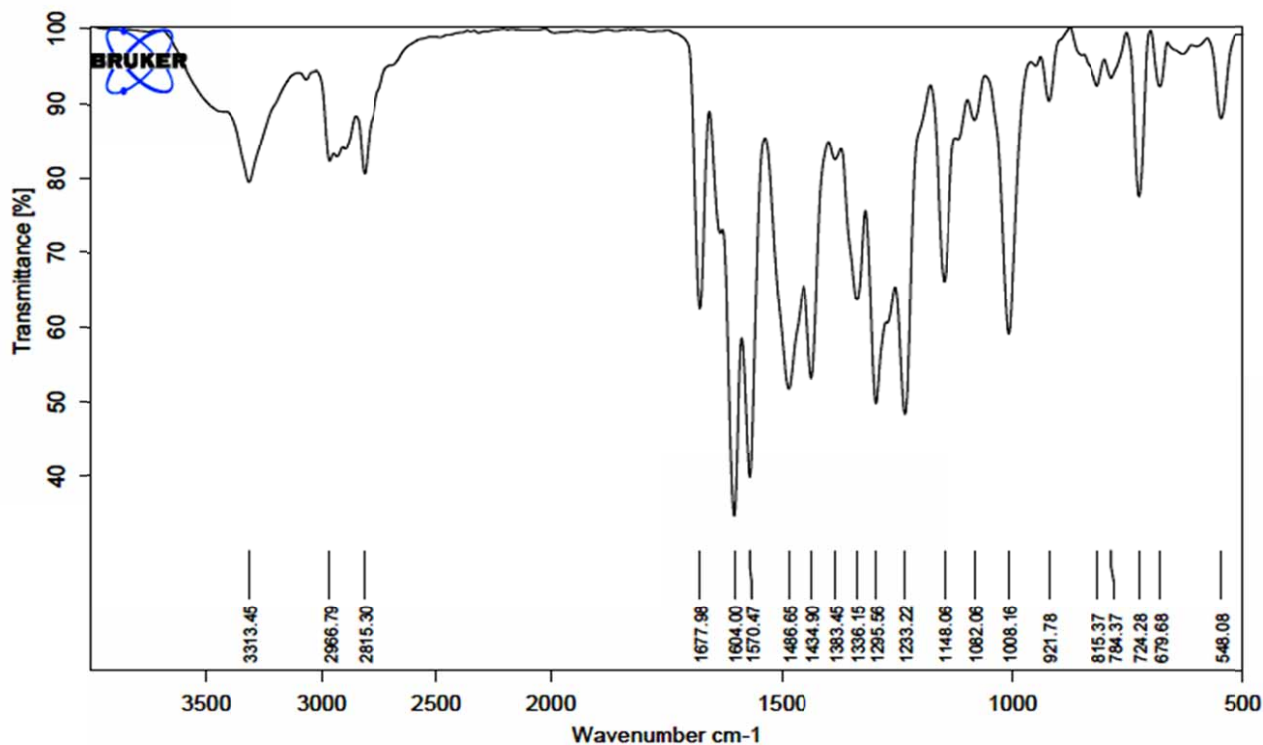

Fig. S6: IR Spectrum of compound 5

2. **NMR spectra:** The NMR spectra of the 2-chloro-3-{2-(piperazinyl)ethyl}-amino-1, 4-naphthoquinone (**L**), its triethyl ammonium dtc salt and complexes are summarized below as Fig. S7 to S12.

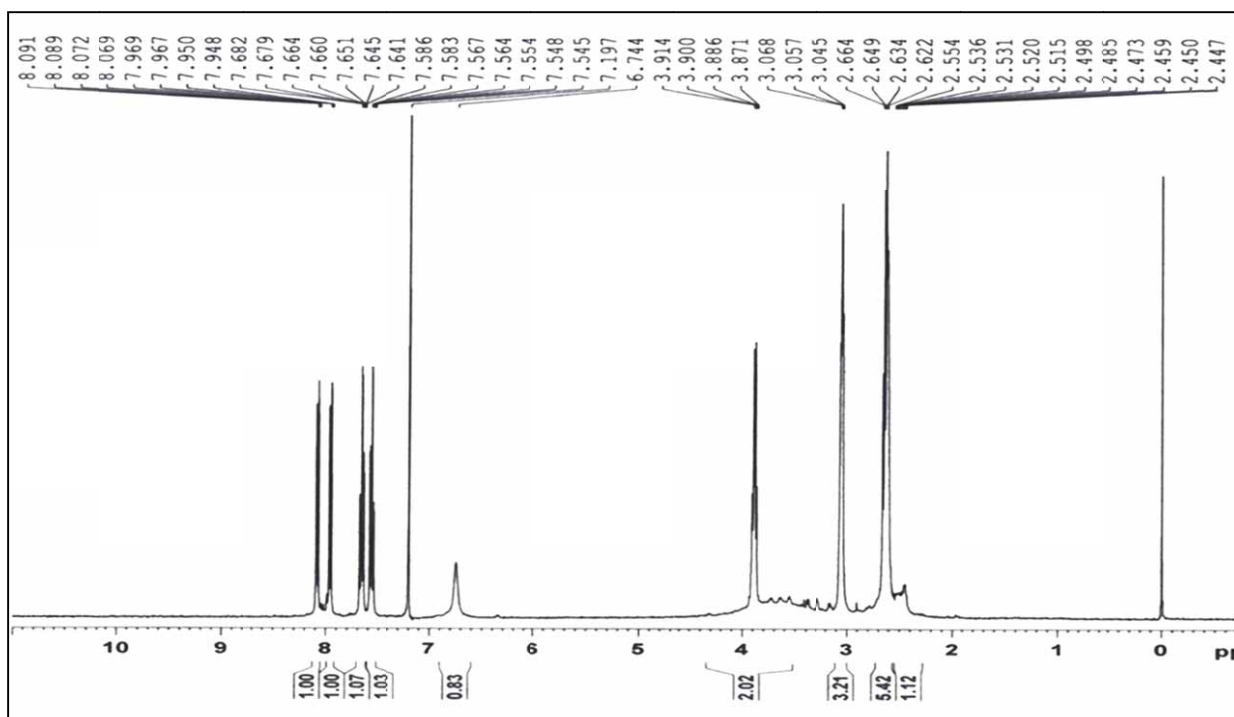

Fig. S7:  $^1\text{H}$  NMR spectrum of the 2-chloro-3-{2-(piperazinyl)ethyl}-amino-1, 4-naphthoquinone (**L**).

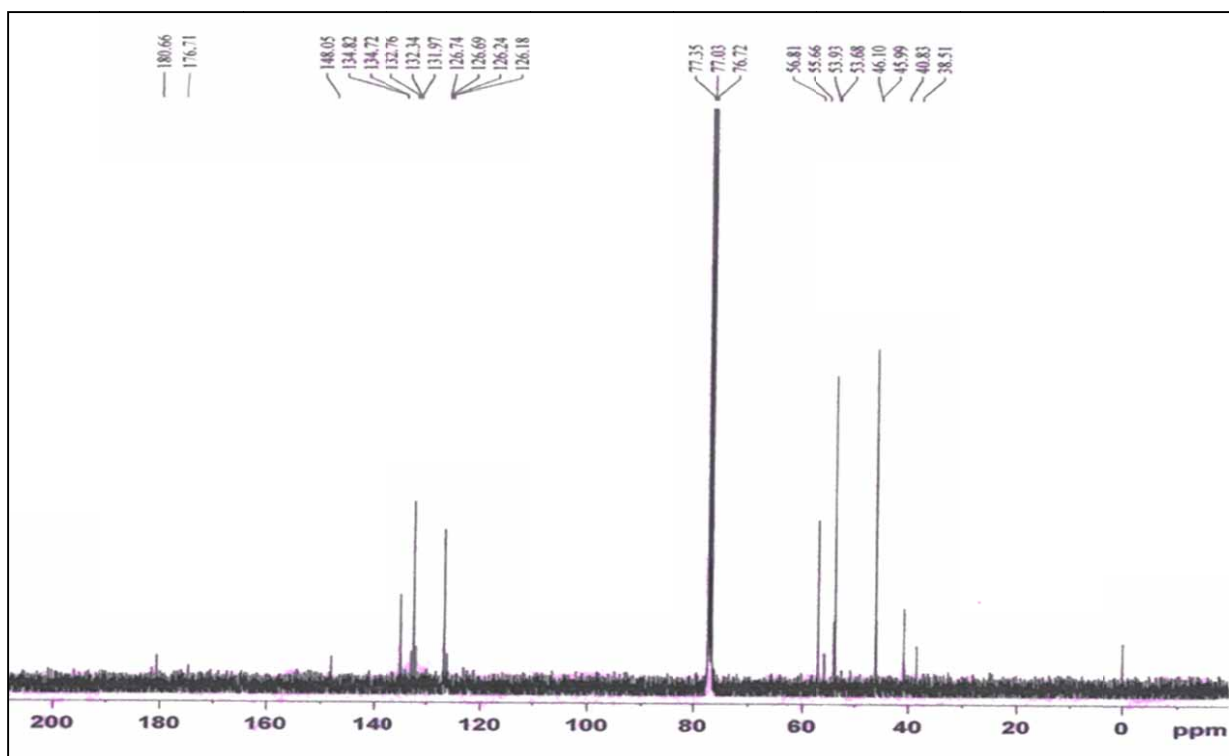

Fig. S8:  $^{13}\text{C}$  NMR spectrum of 2-chloro-3-{2-(piperazinyl)ethyl}-amino-1,4-naphthoquinone (**L**).

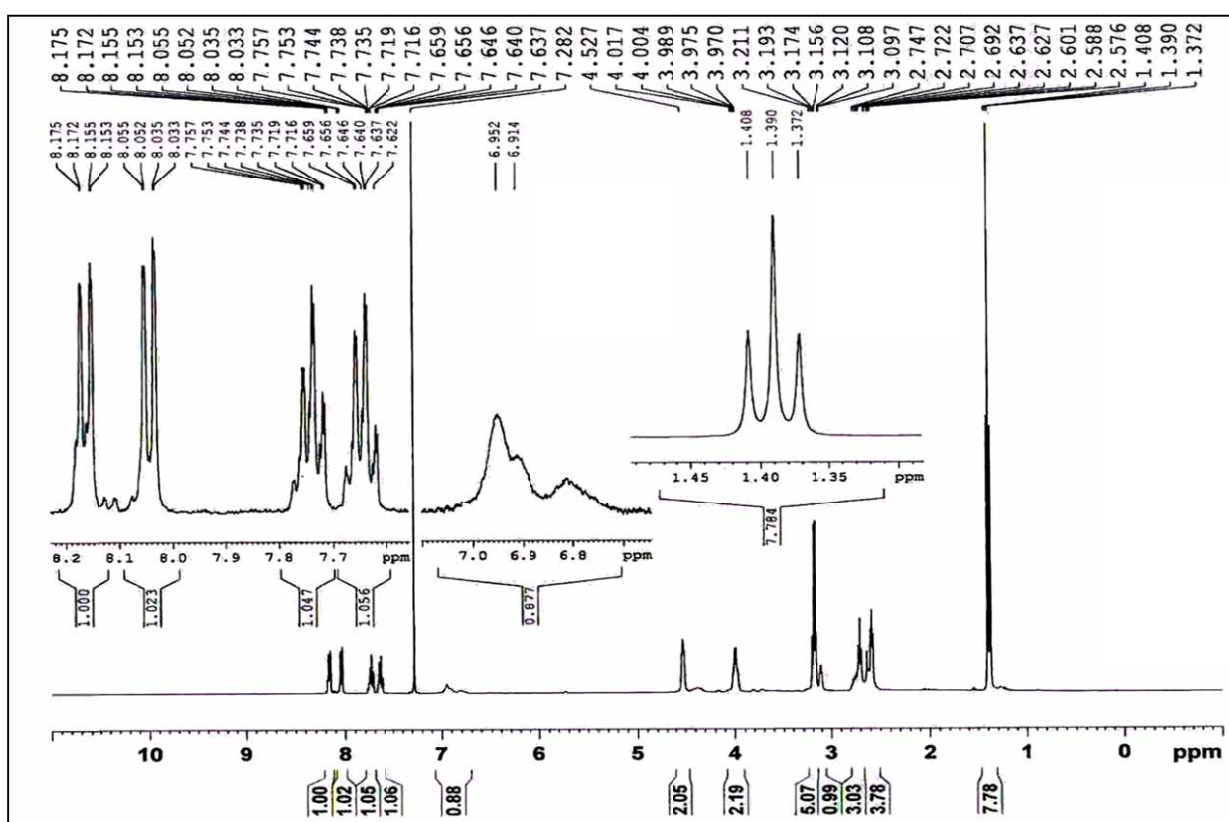

Fig. S9:  $^1\text{H}$  NMR spectrum of triethyl ammonium dtc salt of the ligand precursor **L**.

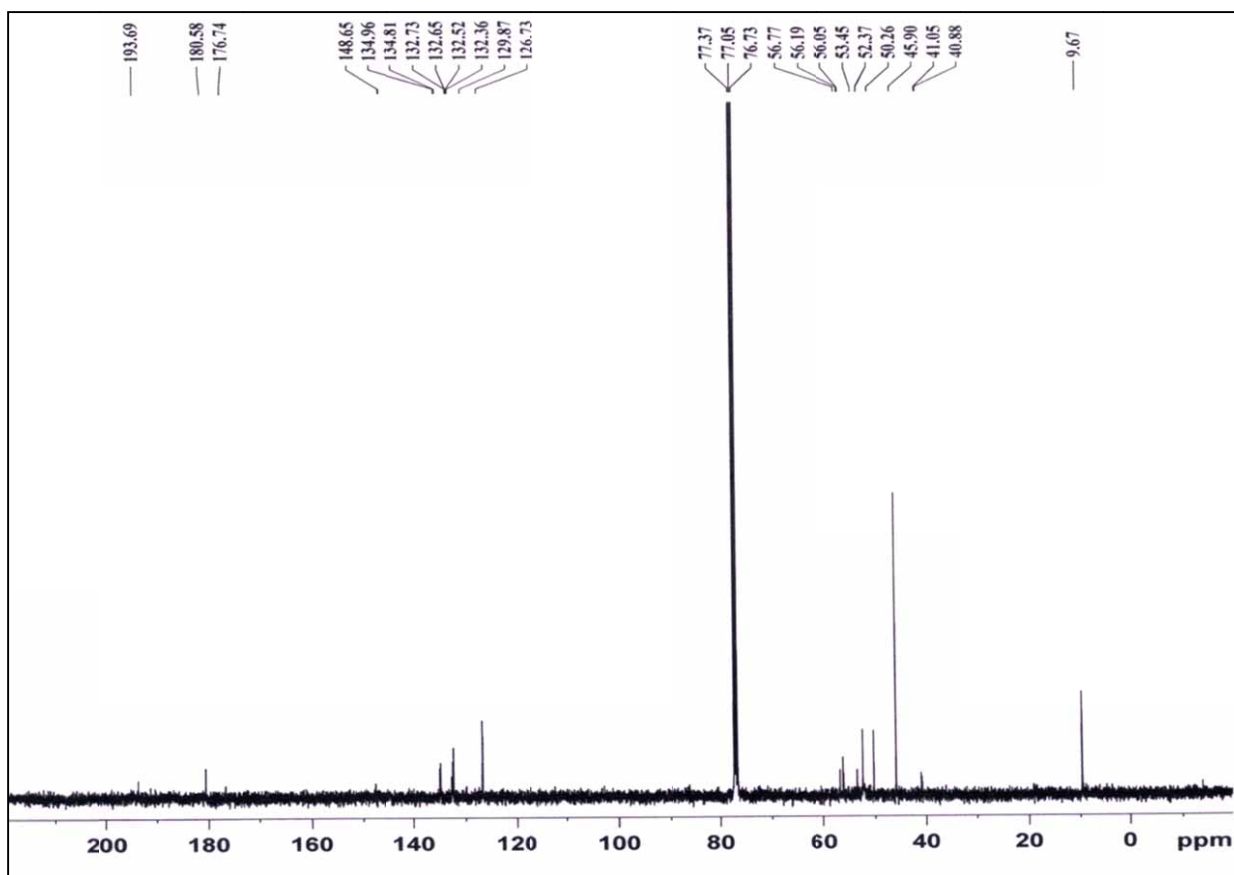

Fig. S10:  $^{13}\text{C}$  NMR spectrum of triethyl ammonium dtc salt of the ligand precursor L.

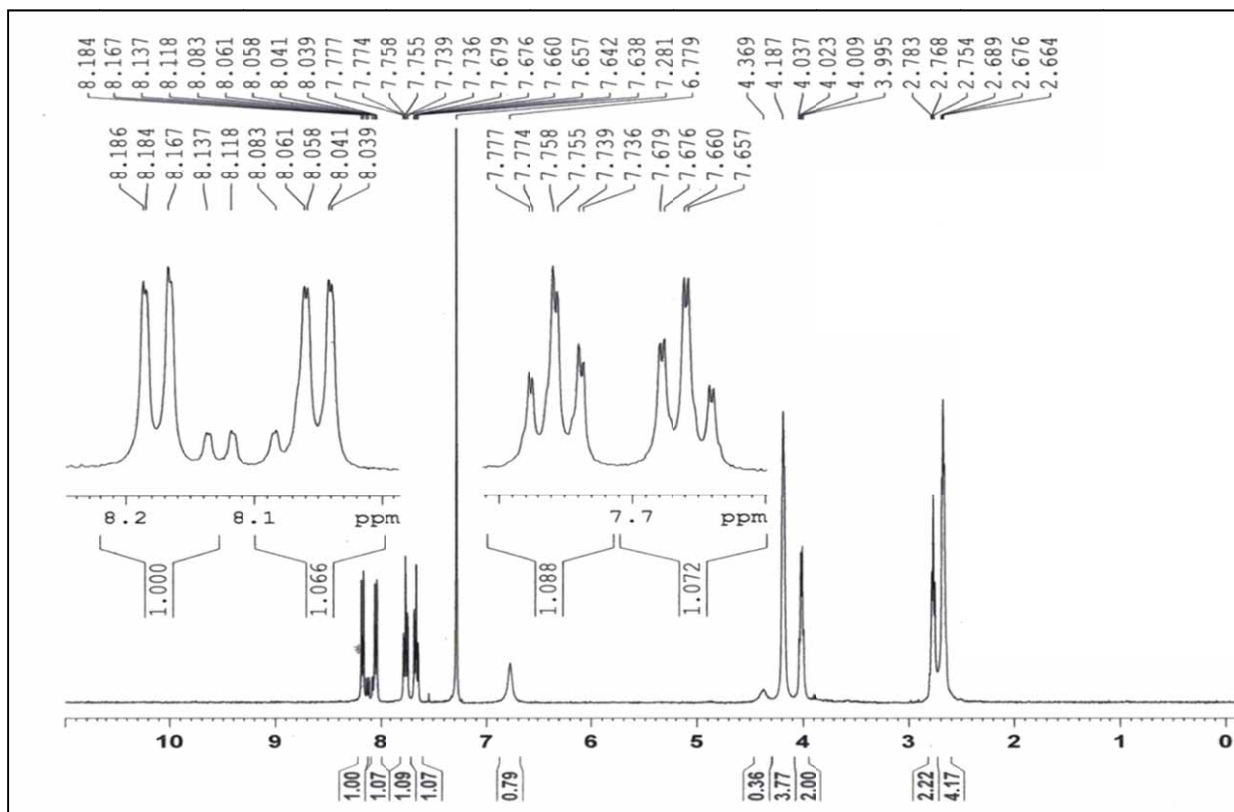

Fig. S11:  $^1\text{H}$  NMR spectrum of compound 5.

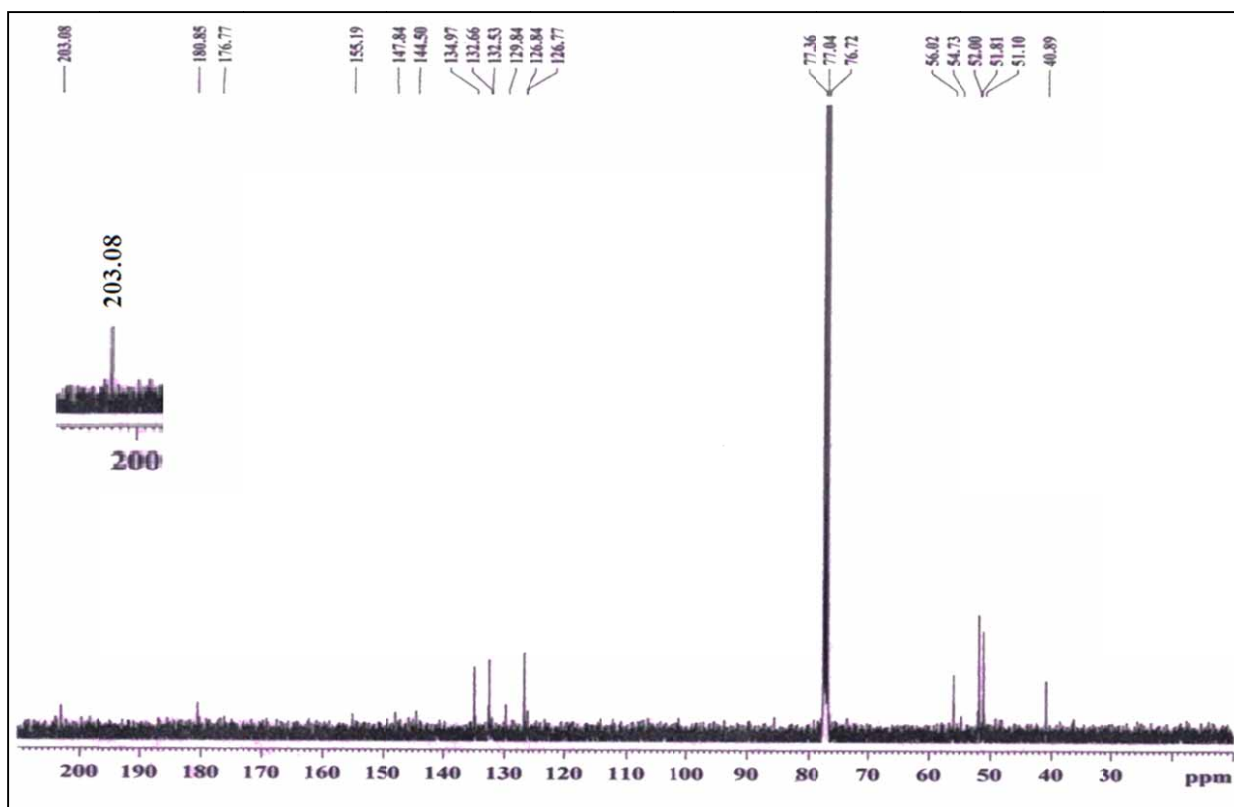

Fig. S12:  $^{13}\text{C}$  NMR spectrum of compound 5.

3. **ESI MS spectra:** The ESI MS spectra of the dithiocarbamate metal complexes are summarized below as Fig. S13 to S18

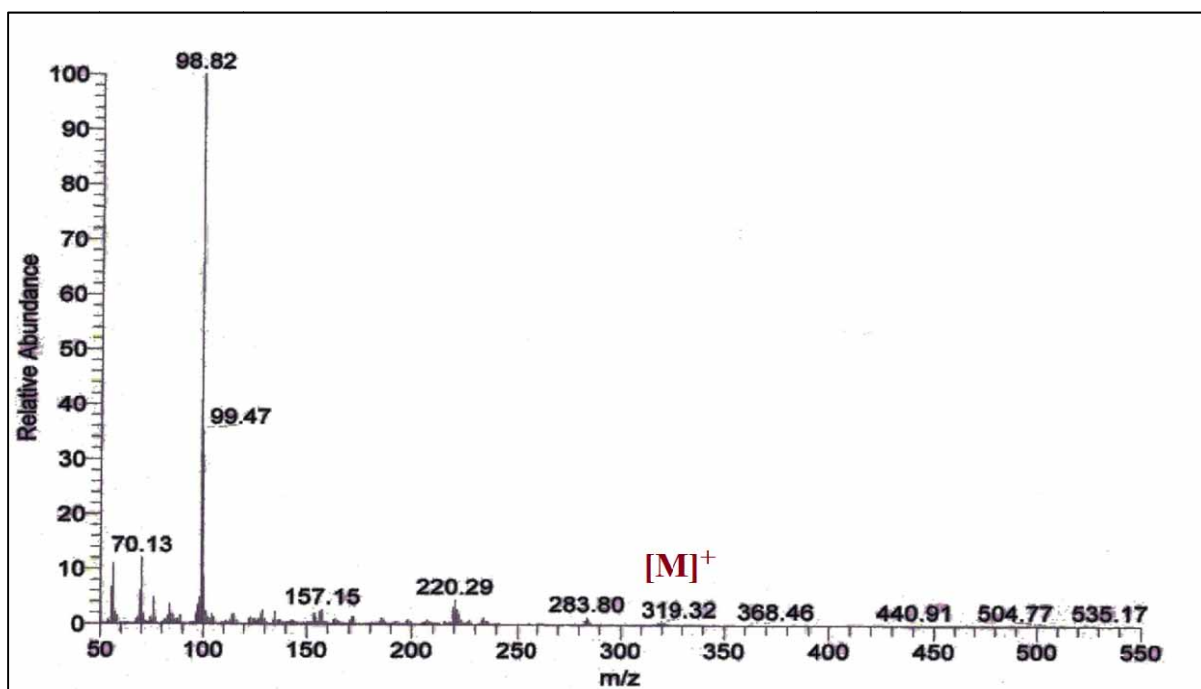

Fig. S13: GC MS spectrum of 2-chloro-3-{2-(piperazinyl)ethyl}-amino-1, 4-naphthoquinone (**L**).

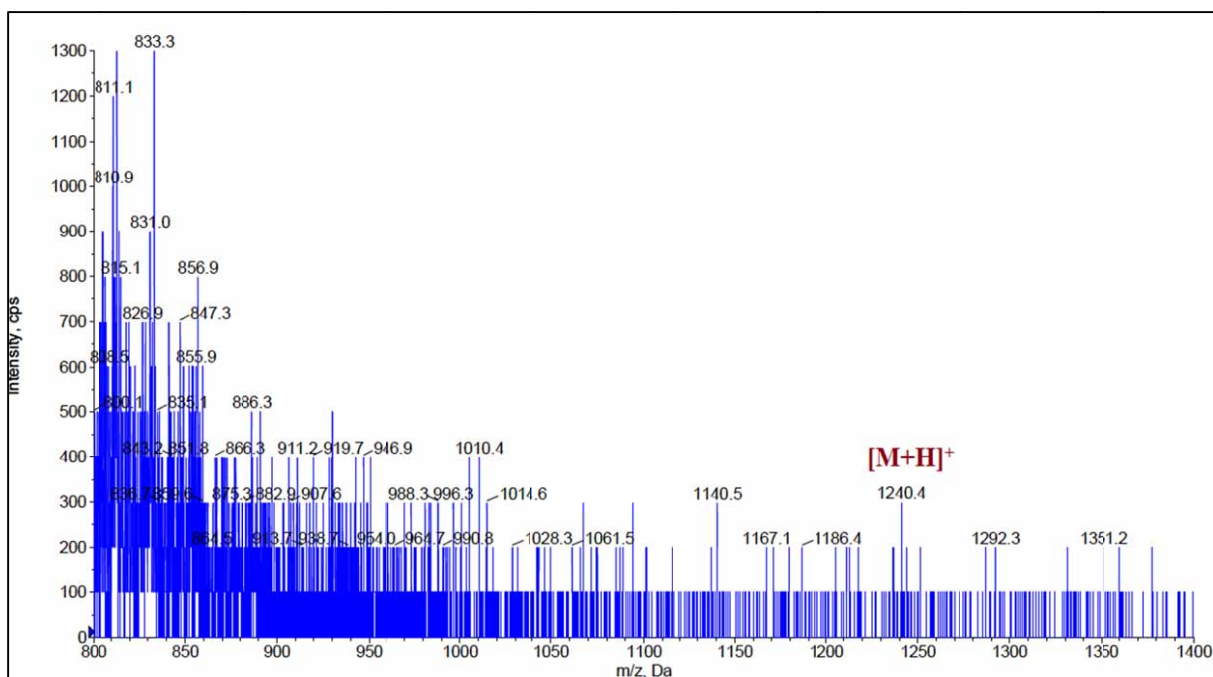

Fig. S14: LC MS spectra of compound 1.

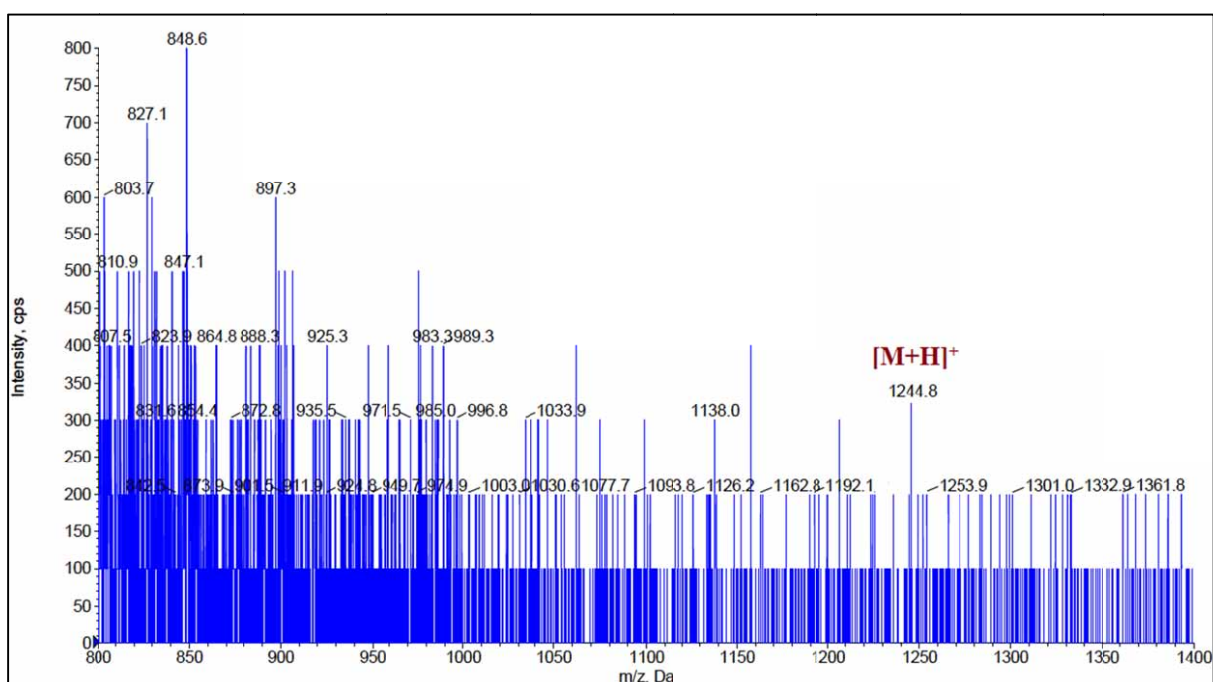

Fig. S15: LC MS spectra of compound 2.



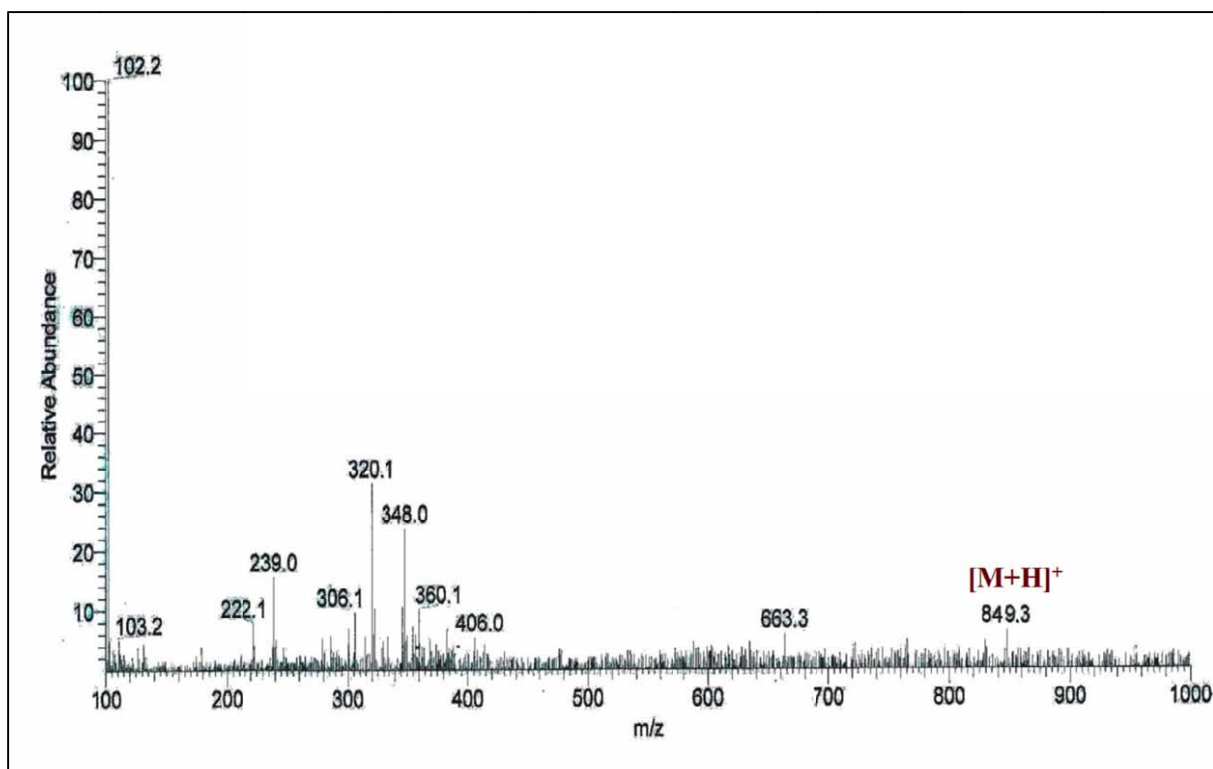

Fig. S16: ESI MS spectra of compound 3.

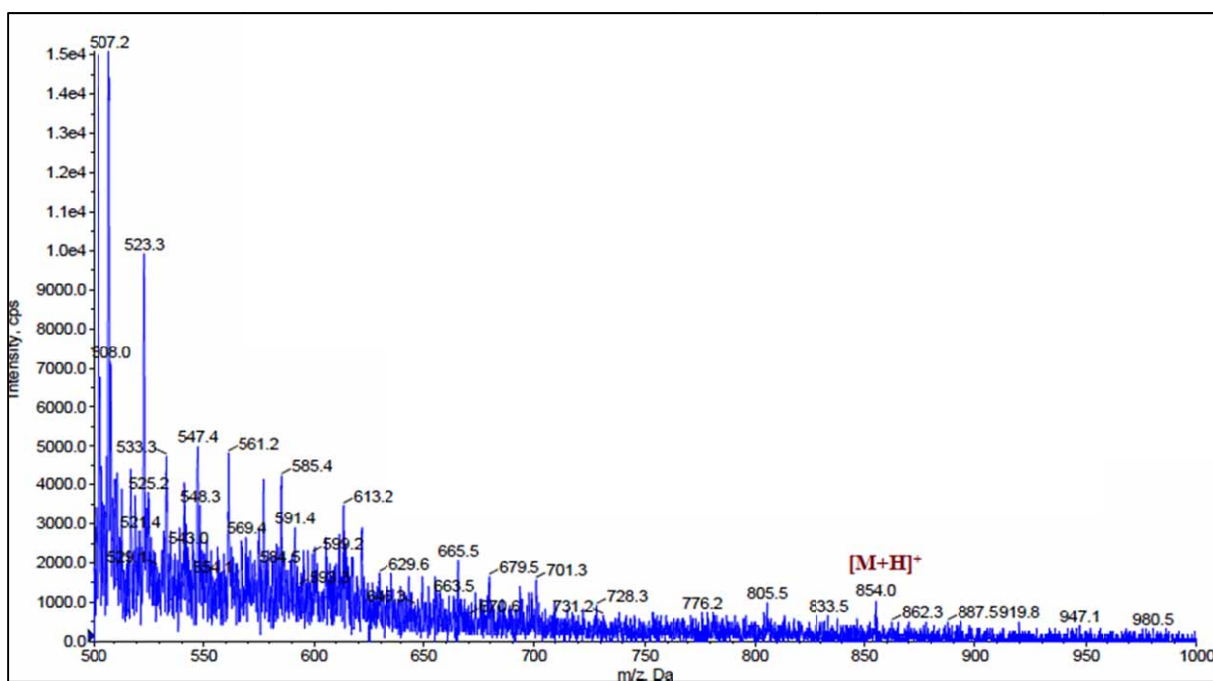

Fig. S17: LC MS spectra of compound 4.

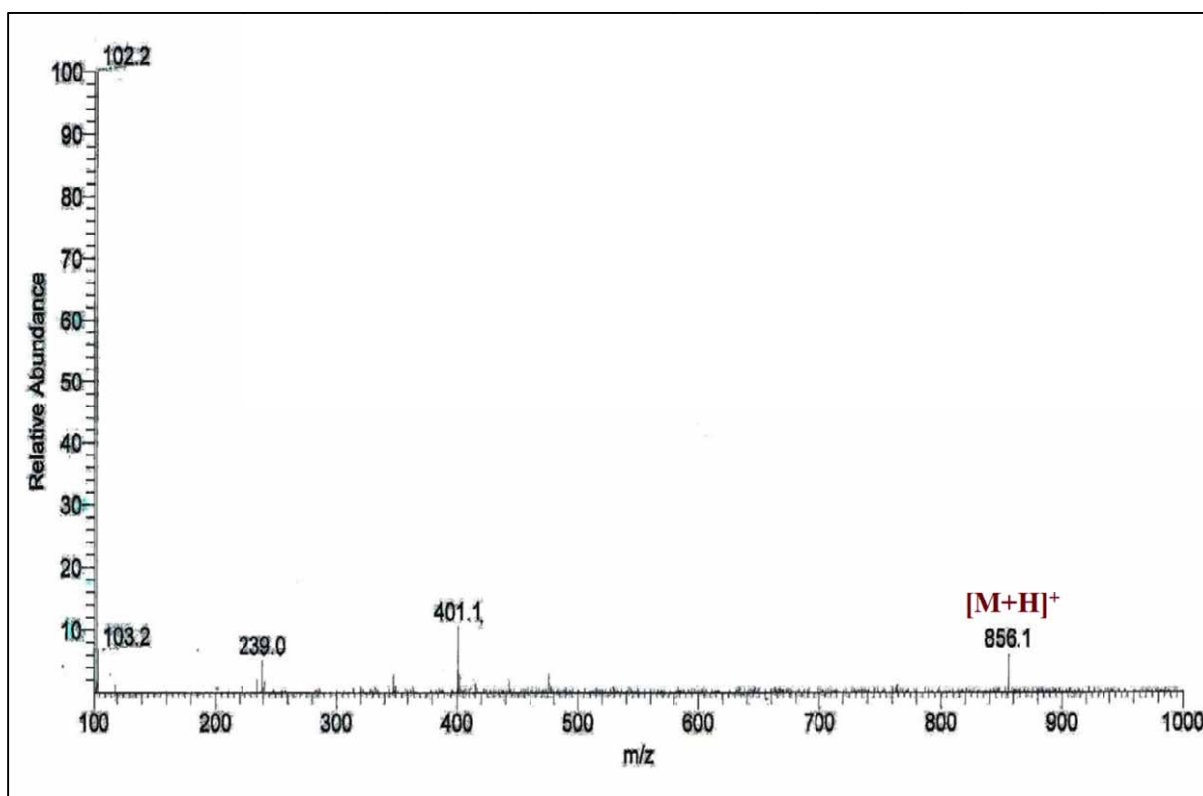

Fig. S18: ESI MS spectra of compound 5.

4. **TG/DTA:** TG/ DTA curve of the dithiocarbamate metal complexes are summarized below as Fig. S19 to S20

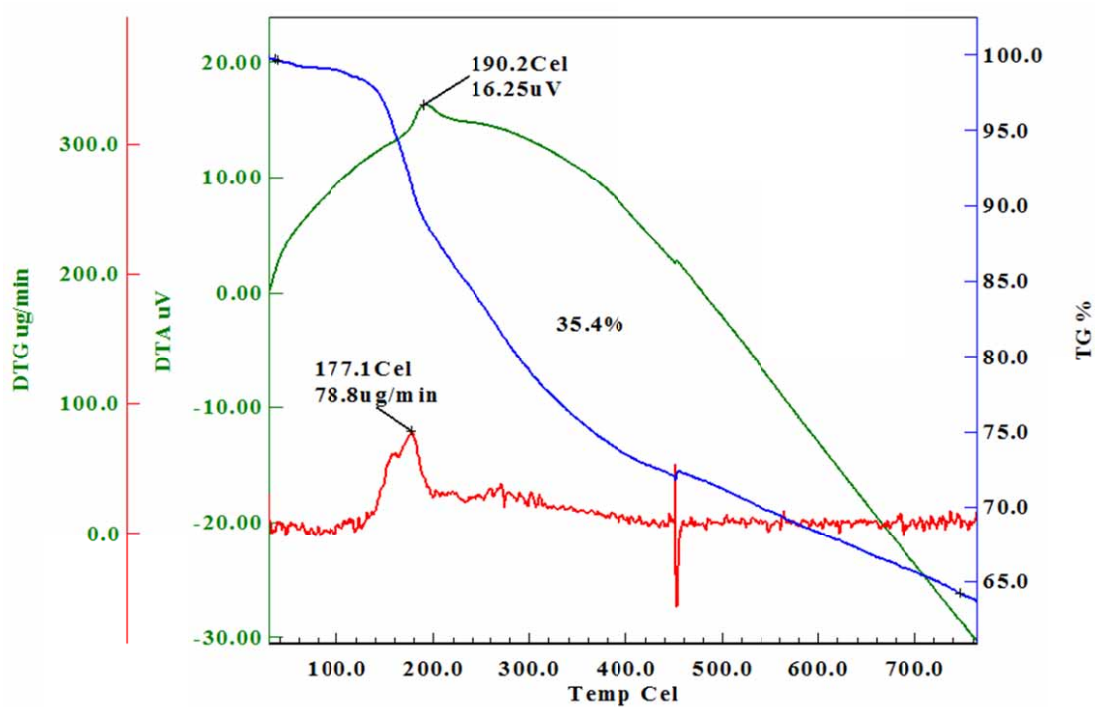

Fig. S19: TG/DTA curve of the dithiocarbamate metal complexes 1

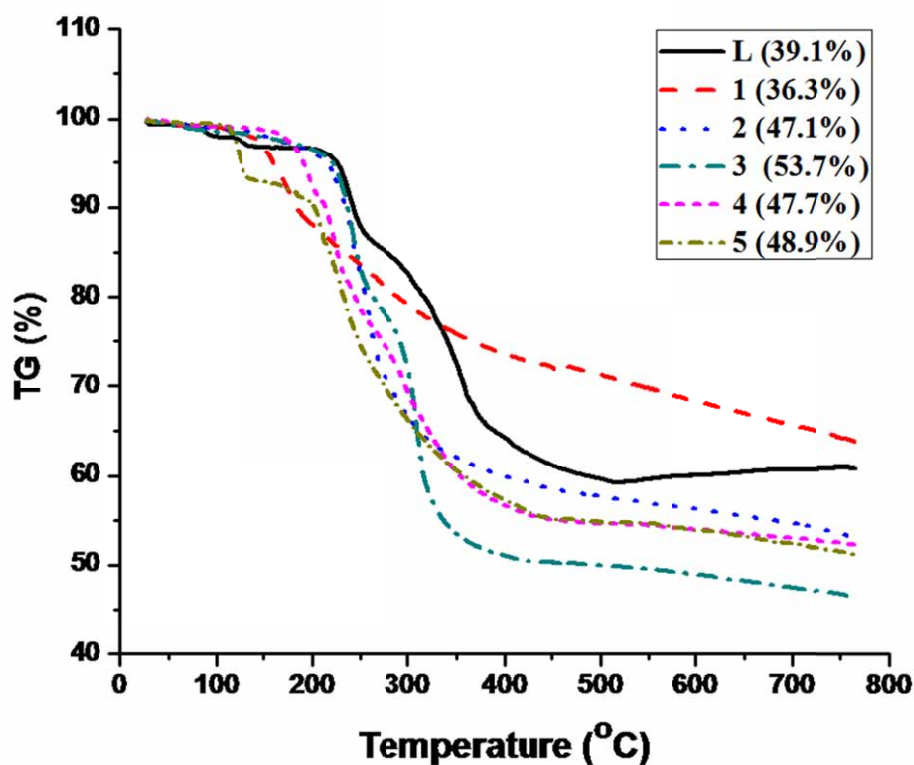

Fig. S20: TG curves of the dithiocarbamate metal complexes **1-5**

**Table S1:** Summary of the calculated values of ES-MS (other than  $[M+H]$  and  $[M]^+$  ion peaks) matches well with the observed ones on MS spectra of **L** and **1-5**.

| Entry | Loss of fragment                                                                                                                | Corresponding weight | Remaining weight | Observed weight corresponding to base peak in MS |
|-------|---------------------------------------------------------------------------------------------------------------------------------|----------------------|------------------|--------------------------------------------------|
| L     | Piperazine moiety<br>[C <sub>5</sub> H <sub>11</sub> N <sub>2</sub> ]                                                           | 98.82                | 220.5            | 99                                               |
| 1     | Loss of two molecules of naphthoquinone moiety<br>C <sub>20</sub> H <sub>8</sub> Cl <sub>2</sub> N <sub>2</sub> O <sub>4</sub>  | 410                  | 830              | 833                                              |
| 2     | Loss of two molecule of naphthoquinone moiety with chlorine and nitrogen<br>[C <sub>10</sub> H <sub>4</sub> O <sub>2</sub> ClN] | 401.1                | 843              | 848.6                                            |
| 3     | Two molecule of piperazinyll dithiocarbamate<br>[C <sub>5</sub> N <sub>2</sub> S <sub>2</sub> ]                                 | 320.1                | 529.3            | 320                                              |
| 4     | Remaining fragment after loss of two molecule of piperazinyll dithiocarbamate                                                   | 523                  | 321              | 523.3                                            |

|   |                                                                                                   |       |     |     |
|---|---------------------------------------------------------------------------------------------------|-------|-----|-----|
|   | $[C_5H_8N_2S_2]$<br>$C_{29}H_{26}Cl_2N_4S_2Cu$                                                    |       |     |     |
| 5 | <b>1.</b> Two molecule of naphthoquinone moiety with chlorine and nitrogen<br>$[C_{10}H_4O_2ClN]$ | 401.1 | 455 | 410 |
|   | <b>2.</b> Piperazine moiety<br>$[C_5H_{12}N_2]$                                                   | 102.2 | 754 | 100 |
